# Supplementary material for: Mapping Systemic Inflammation and Antibody Responses in Multisystem Inflammatory Syndrome in Children (MIS-C)
Source: PubMed Central journal article supplement — medRxiv. 2020 Jul 6:2020.07.04.20142752. Preprint. [Version 1] doi: 10.1101/2020.07.04.20142752 (PMC7359537; doi:10.1101/2020.07.04.20142752), 2020-07-06
Supplement: NIHPP2020.07.04.20142752-supplement-1.pdf [file NIHPP2020.07.04.20142752-supplement-1.pdf]

## Supplementary Information

### Supplementary Figure Legends

Figure S1 (*Related to Table 1*). MIS-C disease course and sample collection. (A) Timeline of admission, treatment, sample collection and discharge. (B) Laboratory markers of inflammation, coagulopathy and cardiac dysfunction in response to IVIG and/or TCZ treatment. Dotted lines represent normal limits.

Figure S2 (*Related to Table 1*). White blood cell count and differential in response to TCZ and IVIG treatment. (Left) Percentage values of immune cell types during treatment course to TCZ and IVIG across all MIS-C patients. (Right) Absolute counts of immune cell types during treatment course to TCZ and IVIG across all MIS-C patients. Dotted lines represent normal limits.

Figure S3 (*Related to Figure 3*). Mass cytometry of peripheral blood immune cells. (A) Immune cell frequencies expressed as the log<sub>2</sub> fold change over the mean of healthy controls. (B). B-cell frequency as percent of single cells. (C). Expression of CD169, an interferon-stimulated gene, in monocytes. (E) Relative STAT1 phosphorylation.

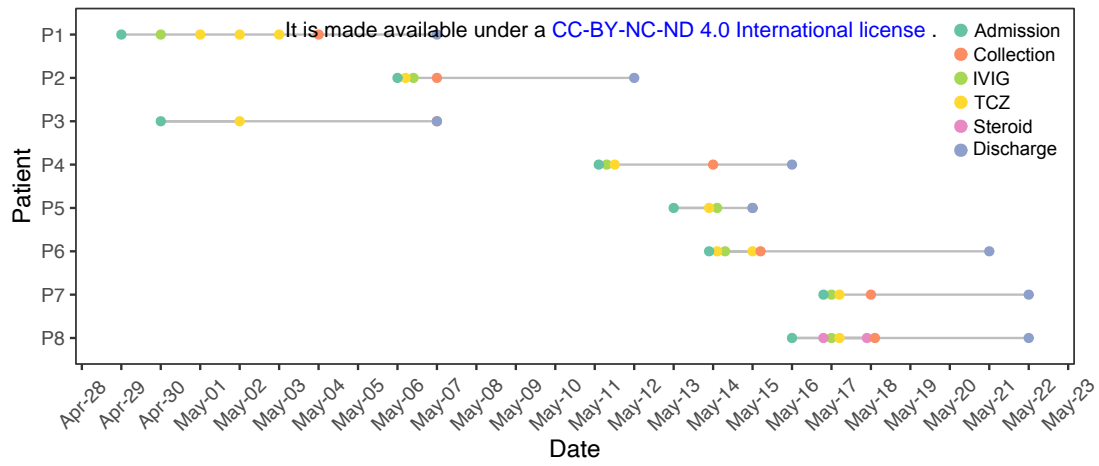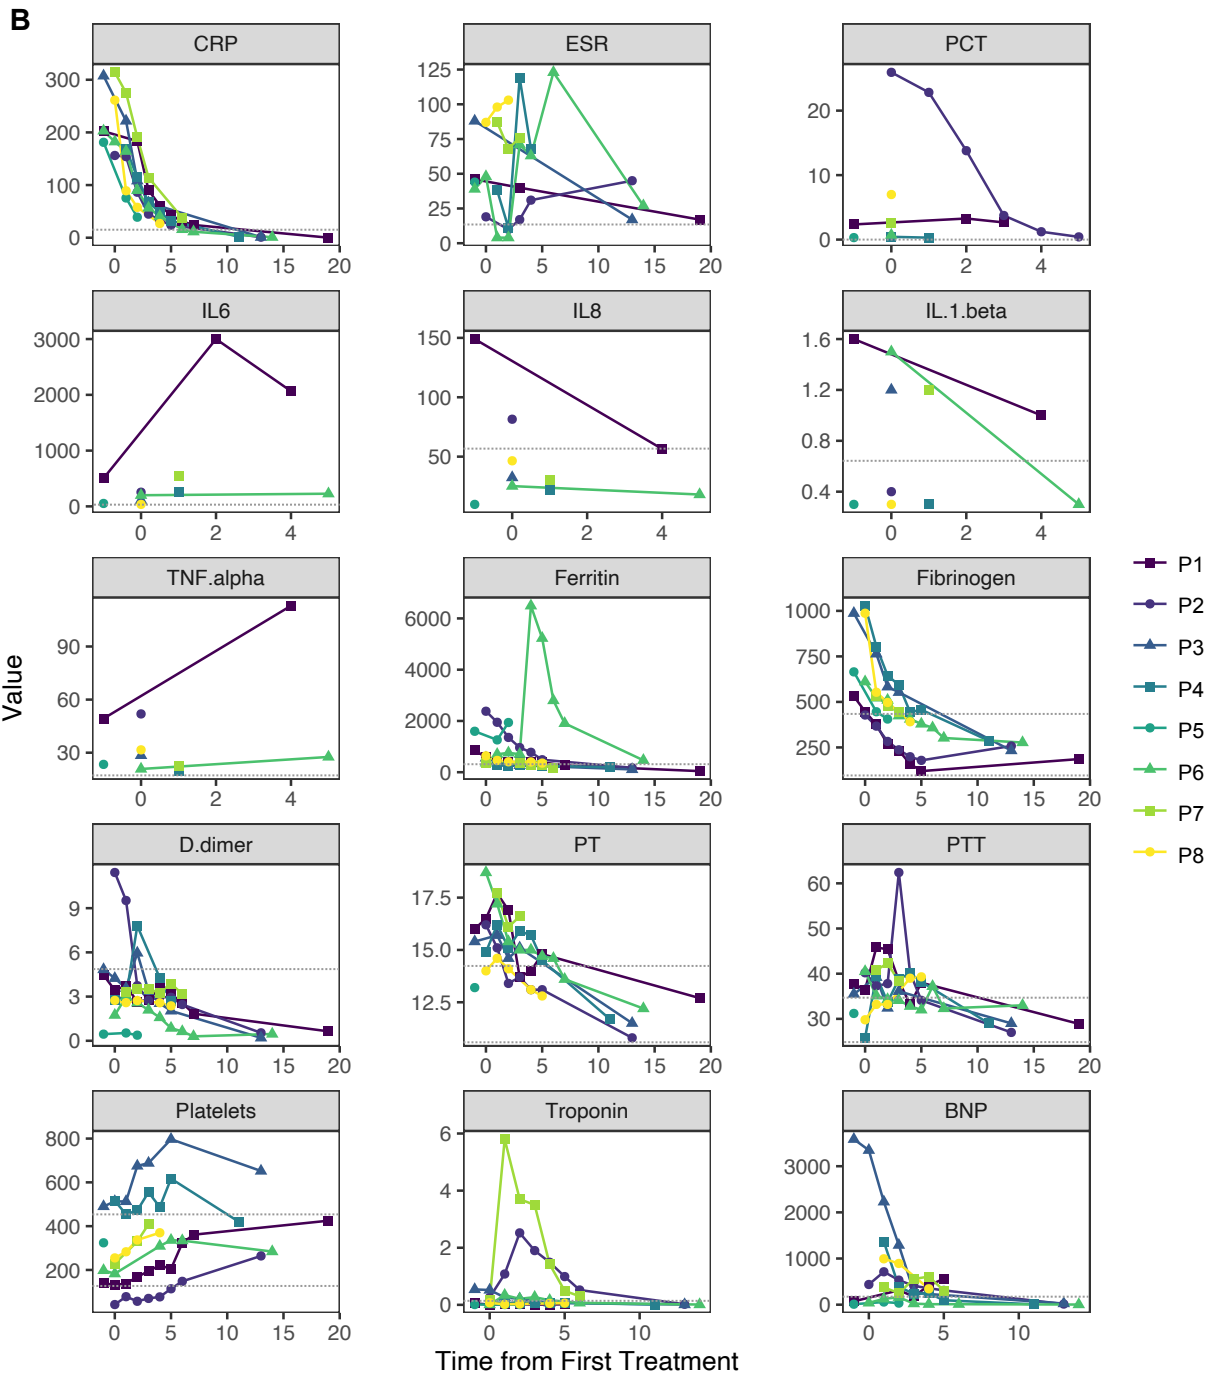

Figure S1

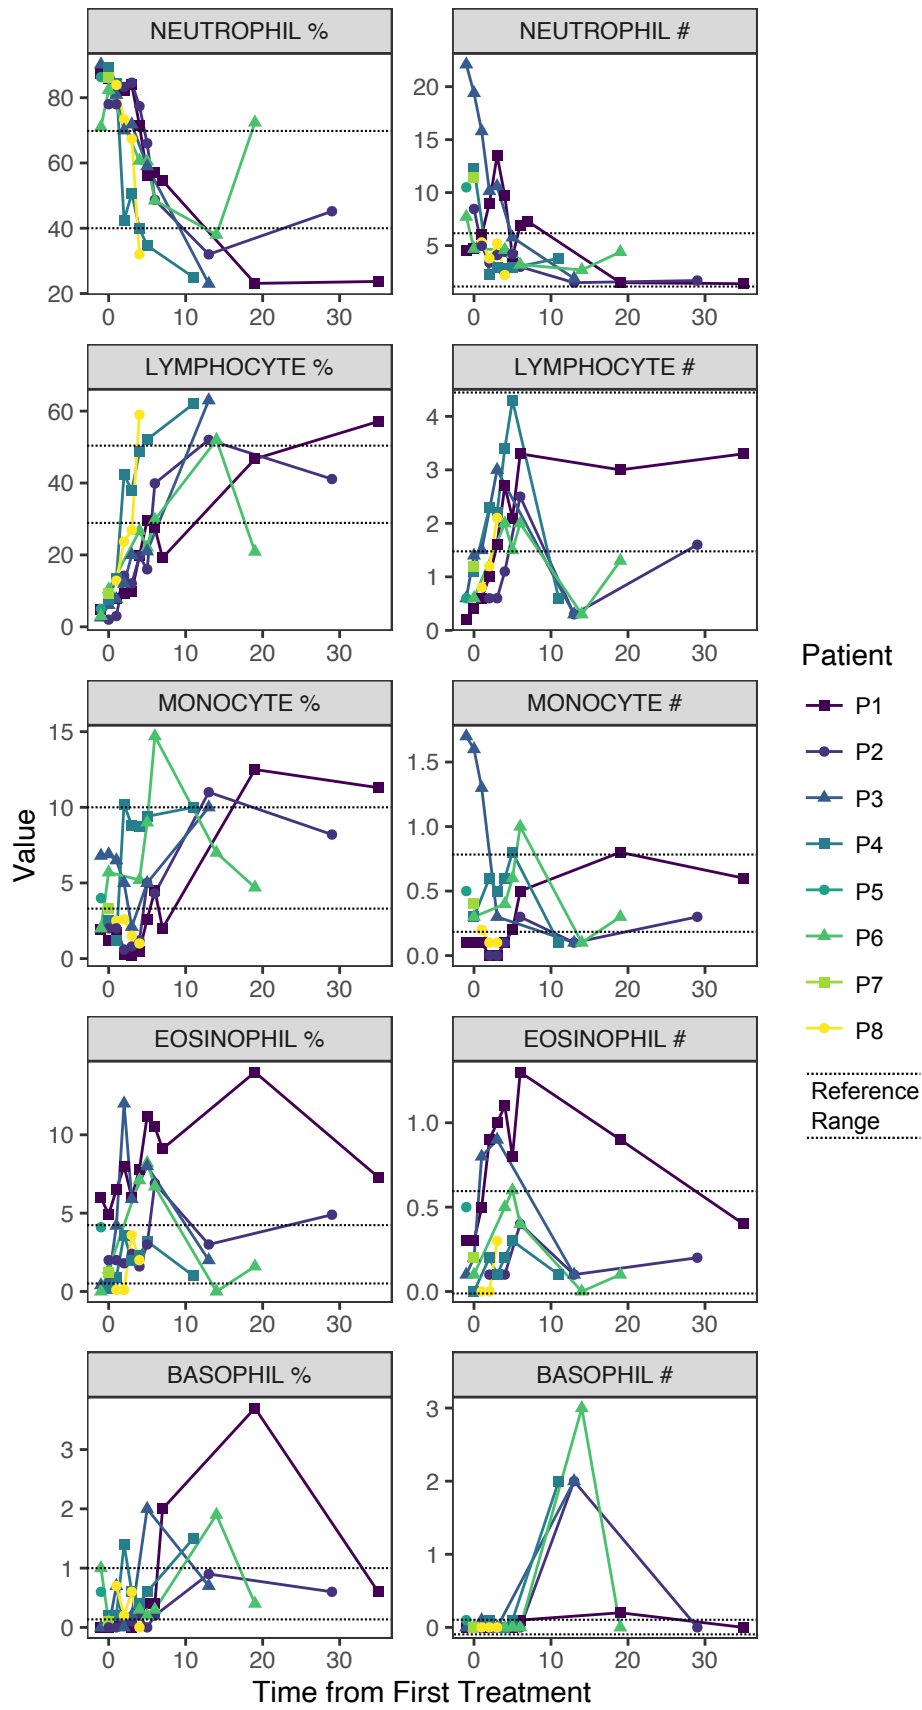

Figure S2

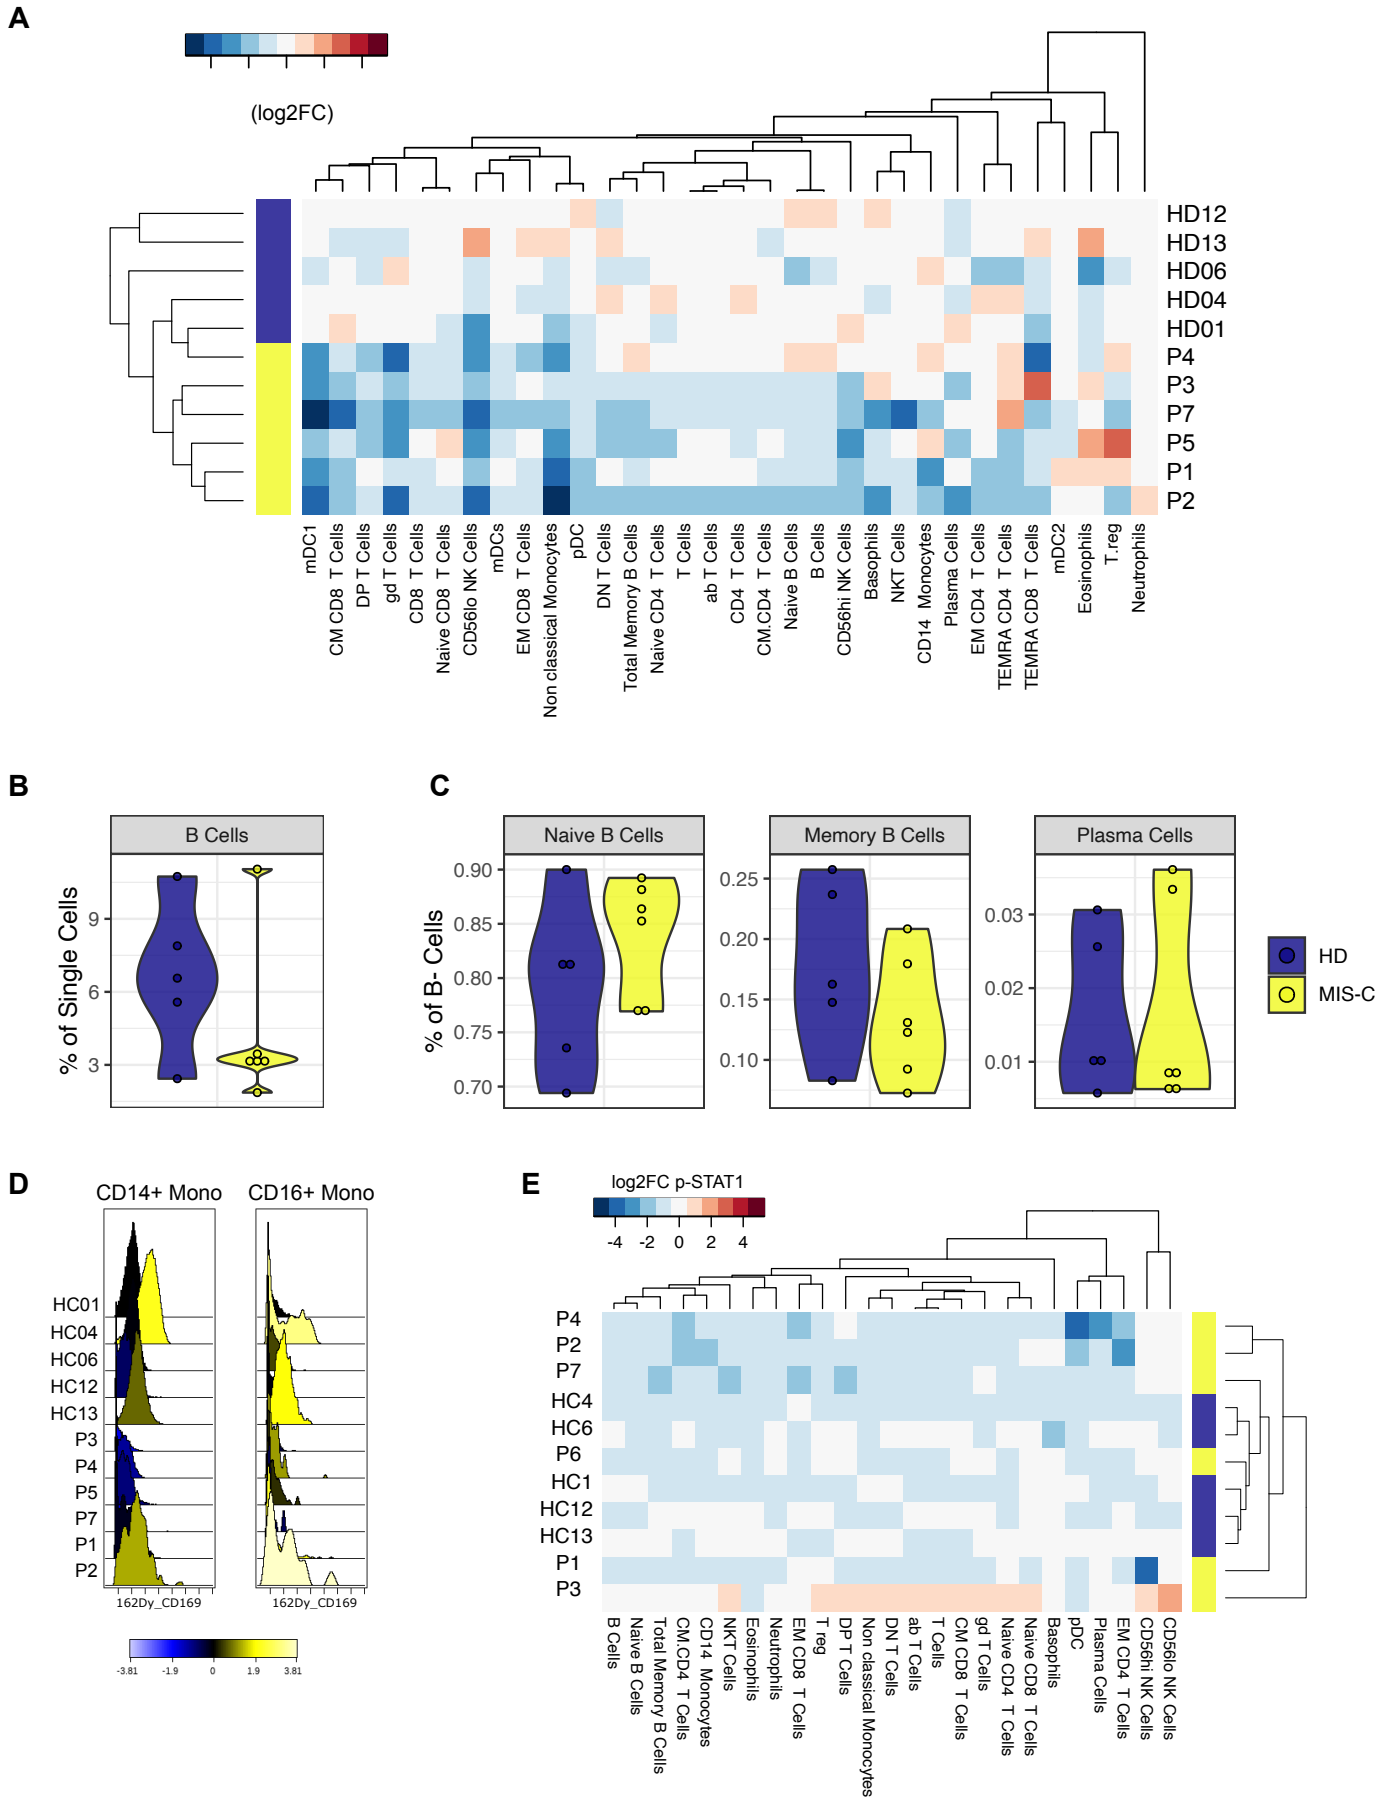

Figure S3
